# Supplementary material for: Recombinant Bovine Herpesvirus Type I Expressing the Bovine Viral Diarrhea Virus E2 Protein Could Effectively Prevent Infection by Two Viruses
Source: MDPI journal article supplement (doi:10.3390/v14081618), 2022-07-25
Supplement: s1 [file s1]

Supplemental Table S1. Clinical Scoring Criteria

| Clinical score | Rectal temperature | Respiratory symptoms                             | Mental state                                                                    | Nasal secretions                 | Diarrhea symptoms                  |
|----------------|--------------------|--------------------------------------------------|---------------------------------------------------------------------------------|----------------------------------|------------------------------------|
| Normal         | ≤39.5℃             | Normal breathing                                 | Normal status                                                                   | none                             | Normal stool                       |
| Mild           | 39.6~40.0℃         | slight difficulty breathing                      | Head down, moving infrequently                                                  | Serous nasal fluid               | Stools are soft and slightly runny |
| Moderate       | 40.1~40.5℃         | Dyspnea, obvious abdominal breathing, with cough | Lying down, reluctance to move                                                  | Purulent nasal fluid             | Watery diarrhea                    |
| Severe         | 40.6~41.5℃         | Grunting or harsh breathing                      | Difficulty standing and unresponsive to stimuli from people and the environment | Massive mucopurulent nasal fluid | Watery bloody diarrhea             |

Supplemental Table S2. BoHV-1 shedding of nasal swabs in guinea pigs after challenge

[illegible]

[illegible]

guinea pigs after challenge

[illegible]

Supplemental Table S4. White blood cell count in guinea pigs  
after challenge

| Group<br>and guinea<br>pigs number                              | Challenge days |     |     |      |      |      |     |     |     |     |     |     |      |      |      |      |      |
|-----------------------------------------------------------------|----------------|-----|-----|------|------|------|-----|-----|-----|-----|-----|-----|------|------|------|------|------|
|                                                                 |                | 0   | 1   | 2    | 3    | 4    | 5   | 6   | 7   | 8   | 9   | 10  | 11   | 12   | 13   | 14   | 15   |
| BVDV-1<br>immunization<br>group                                 | 1              | 7.4 | 6.1 | 7.3  | 7.6  | 6.3  | 6.8 | 6.8 | 6.8 | 7.0 | 7.4 | 6.5 | 7.1  | 7.9  | 8.8  | 8.8  | 8.3  |
|                                                                 | 2              | 5.2 | 7.8 | 6.6  | 5.8  | 7.2  | 4.9 | 5.8 | 7.2 | 8.6 | 6.5 | 6.0 | 7.2  | 9.0  | 6.5  | 8.8  | 10.0 |
|                                                                 | 3              | 8.0 | 7.7 | 7.3  | 7.0  | 7.1  | 6.7 | 6.8 | 6.9 | 6.7 | 7.1 | 7.5 | 7.3  | 6.9  | 7.9  | 8.0  | 6.6  |
|                                                                 | 4              | 7.6 | 6.5 | 7.2  | 8.0  | 7.2  | 6.9 | 6.7 | 7.2 | 7.6 | 8.2 | 6.3 | 6.4  | 7.0  | 6.7  | 6.2  | 7.3  |
|                                                                 | 5              | 6.8 | 7.2 | 7.0  | 7.3  | 6.8  | 6.0 | 6.4 | 6.8 | 7.1 | 6.7 | 7.5 | 6.9  | 6.3  | 6.4  | 6.2  | 6.0  |
| BoHV-1<br>gE/E2-Linker-E2 <sup>+</sup><br>immunization<br>group | 6              | 8.3 | 7.9 | 6.9  | 6.9  | 7.2  | 8.2 | 7.6 | 6.9 | 7.9 | 7.4 | 7.6 | 8.6  | 8.4  | 8.2  | 7.2  | 7.5  |
|                                                                 | 7              | 7.6 | 8.0 | 8.5  | 7.7  | 8.3  | 7.0 | 7.6 | 8.6 | 8.4 | 7.9 | 7.6 | 10.9 | 8.1  | 8.5  | 7.8  | 8.4  |
|                                                                 | 8              | 8.5 | 8.6 | 8.6  | 7.6  | 7.3  | 6.4 | 7.2 | 7.1 | 8.6 | 8.1 | 7.8 | 7.8  | 7.6  | 8.2  | 7.9  | 8.6  |
|                                                                 | 9              | 9.1 | 8.2 | 10.6 | 10.1 | 9.2  | 9.3 | 8.5 | 9.0 | 9.0 | 7.7 | 8.6 | 8.2  | 9.6  | 8.8  | 8.3  | 8.7  |
|                                                                 | 10             | 7.6 | 7.2 | 6.9  | 6.9  | 7.1  | 7.2 | 8.1 | 7.7 | 7.4 | 7.3 | 6.9 | 8.2  | 7.7  | 7.9  | 7.5  | 7.4  |
| Challenge<br>control group                                      | 11             | 8.2 | 7.4 | 7.1  | 8.2  | 8.0  | 7.5 | 7.6 | 7.8 | 7.4 | 6.9 | 6.8 | 7.0  | 7.0  | 7.2  | 7.5  | 7.7  |
|                                                                 | 12             | 8.1 | 7.6 | 6.9  | 8.0  | 6.9  | 6.8 | 7.2 | 7.5 | 7.9 | 6.9 | 7.4 | 7.0  | 6.8  | 6.7  | 7.1  | 8.0  |
|                                                                 | 13             | 7.5 | 6.9 | 8.2  | 8.5  | 8.3  | 8.2 | 6.0 | 6.2 | 6.4 | 5.8 | 8.5 | 9.7  | 6.6  | 6.7  | 7.1  | 7.6  |
|                                                                 | 14             | 6.3 | 7.2 | 7.5  | 7.6  | 10.3 | 7.7 | 5.8 | 5.7 | 5.5 | 5.5 | 8.2 | 6.8  | 7.5  | 6.4  | 6.9  | 8.0  |
|                                                                 | 15             | 8.2 | 6.5 | 7.2  | 6.3  | 9.7  | 8.0 | 6.1 | 4.5 | 7.2 | 6.5 | 8.3 | 7.8  | 9.4  | 7.9  | 8.1  | 6.6  |
| Blank control<br>group                                          | 16             | 7.7 | 7.4 | 7.0  | 7.7  | 7.5  | 8.1 | 6.2 | 6.2 | 6.2 | 6.0 | 6.9 | 7.1  | 7.7  | 7.4  | 7.3  | 7.8  |
|                                                                 | 17             | 7.6 | 8.0 | 6.8  | 7.2  | 7.4  | 6.9 | 6.2 | 6.4 | 6.4 | 6.5 | 6.8 | 6.8  | 7.2  | 7.4  | 7.4  | 7.4  |
|                                                                 | 18             | 6.9 | 7.5 | 7.3  | 8.0  | 8.1  | 7.6 | 6.0 | 6.1 | 6.1 | 7.3 | 6.5 | 6.9  | 7.0  | 7.0  | 7.2  | 7.2  |
|                                                                 | 19             | 8.1 | 8.5 | 8.1  | 9.6  | 8.3  | 7.4 | 7.2 | 8.2 | 7.3 | 7.2 | 9.3 | 7.5  | 10.1 | 10.1 | 10.5 | 10.5 |
|                                                                 | 20             | 5.6 | 5.1 | 6.4  | 6.2  | 6.5  | 5.3 | 6.1 | 7.5 | 6.6 | 7.2 | 5.9 | 5.8  | 6.2  | 8.3  | 8.5  | 6.6  |
|                                                                 | 21             | 9.7 | 8.7 | 9.0  | 9.2  | 9.1  | 7.8 | 9.0 | 6.6 | 6.9 | 6.1 | 6.7 | 5.4  | 9.9  | 9.1  | 10.0 | 9.2  |

Supplemental Table S5. clinical score in calves after challenge

| Group<br>and calves number |                                       | Challenge days |    |    |   |   |   |   |   |   |   |   |   |   |    |    |    |    |    |
|----------------------------|---------------------------------------|----------------|----|----|---|---|---|---|---|---|---|---|---|---|----|----|----|----|----|
|                            |                                       |                | -2 | -1 | 0 | 1 | 2 | 3 | 4 | 5 | 6 | 7 | 8 | 9 | 10 | 11 | 12 | 13 | 14 |
| Control                    | Blank control group                   | 101            | 0  | 0  | 0 | 0 | 0 | 0 | 1 | 0 | 0 | 0 | 0 | 0 | 0  | 0  | 0  | 0  | 0  |
|                            |                                       | 102            | 0  | 0  | 0 | 0 | 0 | 0 | 0 | 0 | 0 | 1 | 0 | 0 | 0  | 0  | 0  | 0  | 0  |
|                            |                                       | 103            | 0  | 0  | 0 | 0 | 0 | 0 | 0 | 0 | 0 | 0 | 0 | 0 | 0  | 0  | 0  | 0  | 0  |
|                            | Challenge control group               | 104            | 0  | 0  | 0 | 0 | 3 | 2 | 2 | 2 | 2 | 3 | 2 | 2 | 2  | 2  | 2  | 2  | 2  |
|                            |                                       | 105            | 0  | 0  | 0 | 0 | 0 | 0 | 2 | 2 | 2 | 2 | 4 | 3 | 3  | 3  | 3  | 2  | 0  |
|                            |                                       | 106            | 0  | 0  | 0 | 0 | 2 | 0 | 0 | 0 | 3 | 3 | 3 | 4 | 4  | 3  | 3  | 3  | 2  |
| BoHV-1                     | BoHV-1 immunization group             | 107            | 0  | 0  | 0 | 0 | 0 | 0 | 0 | 0 | 0 | 0 | 0 | 0 | 0  | 0  | 0  | 0  | 0  |
|                            |                                       | 108            | 0  | 0  | 0 | 0 | 0 | 0 | 0 | 0 | 1 | 0 | 1 | 0 | 1  | 0  | 0  | 1  | 0  |
|                            |                                       | 109            | 0  | 0  | 0 | 0 | 0 | 0 | 0 | 0 | 0 | 0 | 0 | 0 | 0  | 0  | 0  | 0  | 0  |
|                            | BoHV-1 $\Delta$ gE immunization group | 110            | 0  | 0  | 0 | 0 | 0 | 0 | 0 | 0 | 0 | 0 | 0 | 0 | 0  | 0  | 0  | 0  | 0  |
|                            |                                       | 111            | 0  | 0  | 0 | 0 | 0 | 0 | 0 | 0 | 1 | 0 | 0 | 0 | 0  | 0  | 0  | 0  | 0  |
|                            |                                       | 112            | 0  | 0  | 0 | 0 | 0 | 0 | 0 | 0 | 0 | 0 | 0 | 0 | 0  | 0  | 0  | 0  | 0  |
| BVDV-1                     | BoHV-1 immunization group             | 113            | 0  | 0  | 0 | 0 | 0 | 0 | 0 | 2 | 0 | 0 | 0 | 0 | 0  | 0  | 0  | 0  | 0  |
|                            |                                       | 114            | 0  | 0  | 0 | 0 | 0 | 0 | 1 | 1 | 2 | 0 | 0 | 0 | 0  | 0  | 0  | 0  | 0  |
|                            |                                       | 115            | 0  | 0  | 0 | 0 | 0 | 0 | 0 | 0 | 0 | 0 | 0 | 0 | 0  | 0  | 0  | 0  | 0  |
|                            | BVDV-1 immunization group             | 116            | 0  | 0  | 0 | 0 | 0 | 0 | 0 | 0 | 0 | 0 | 0 | 0 | 0  | 0  | 0  | 0  | 0  |
|                            |                                       | 117            | 0  | 0  | 0 | 0 | 0 | 0 | 0 | 0 | 0 | 0 | 1 | 0 | 1  | 0  | 0  | 0  | 0  |
|                            |                                       | 118            | 0  | 0  | 0 | 0 | 0 | 0 | 0 | 0 | 0 | 0 | 0 | 1 | 1  | 0  | 0  | 0  | 0  |
|                            | BoHV-1 immunization group             | 119            | 0  | 0  | 0 | 0 | 0 | 0 | 0 | 0 | 0 | 0 | 0 | 0 | 0  | 0  | 0  | 0  | 0  |
|                            |                                       | 120            | 0  | 0  | 0 | 0 | 0 | 2 | 0 | 1 | 0 | 1 | 0 | 0 | 1  | 0  | 0  | 0  | 0  |
|                            |                                       | 121            | 0  | 0  | 0 | 0 | 0 | 0 | 0 | 0 | 0 | 0 | 0 | 2 | 2  | 1  | 0  | 0  | 0  |
|                            | Challenge control group               | 122            | 0  | 0  | 0 | 0 | 0 | 0 | 2 | 2 | 3 | 3 | 3 | 3 | 2  | 3  | 2  | 2  | 2  |
|                            |                                       | 123            | 0  | 0  | 0 | 0 | 0 | 0 | 2 | 3 | 3 | 3 | 4 | 4 | 2  | 2  | 3  | 2  | 2  |
|                            |                                       | 124            | 0  | 0  | 0 | 0 | 0 | 0 | 2 | 2 | 3 | 3 | 3 | 2 | 3  | 2  | 2  | 0  | 0  |

Supplemental Table S6. BoHV-1 shedding of nasal swabs in  
calves after challenge

| Group<br>and calves number                                   |     | Challenge days |   |   |   |   |   |   |   |   |   |    |    |    |    |    |
|--------------------------------------------------------------|-----|----------------|---|---|---|---|---|---|---|---|---|----|----|----|----|----|
|                                                              |     | 0              | 1 | 2 | 3 | 4 | 5 | 6 | 7 | 8 | 9 | 10 | 11 | 12 | 13 | 14 |
| Challenge control<br>group                                   | 104 | -              | - | + | + | + | - | + | - | + | + | +  | +  | -  | -  | -  |
|                                                              | 105 | -              | - | + | + | + | - | + | + | + | + | +  | +  | -  | -  | -  |
|                                                              | 106 | -              | - | + | + | + | - | + | + | + | - | +  | +  | -  | -  | -  |
| BoHV-1<br>immunization group                                 | 107 | -              | - | - | - | - | + | + | + | + | + | -  | -  | -  | -  | -  |
|                                                              | 108 | -              | - | - | - | - | - | - | + | + | + | -  | -  | -  | -  | -  |
|                                                              | 109 | -              | - | - | - | - | - | + | + | + | + | -  | -  | -  | -  | -  |
| BoHV-1 $\Delta$ gE<br>immunization group                     | 110 | -              | - | - | - | - | - | + | + | + | + | -  | -  | -  | -  | -  |
|                                                              | 111 | -              | - | - | - | - | - | + | + | + | - | -  | -  | -  | -  | -  |
|                                                              | 112 | -              | - | - | - | - | - | + | + | + | + | -  | -  | -  | -  | -  |
| BoHV-1<br>gE/E2-Linker-E2 <sup>+</sup><br>immunization group | 113 | -              | - | - | - | - | - | + | + | + | - | +  | -  | -  | -  | -  |
|                                                              | 114 | -              | - | - | - | - | - | + | + | + | + | -  | -  | -  | -  | -  |
|                                                              | 115 | -              | - | - | - | - | - | + | + | - | - | -  | -  | -  | -  | -  |

Supplemental Table S7. BVDV-1 shedding of nasal swabs in  
calves after challenge

| Group<br>and calves number                                   |     | Challenge days |   |   |   |   |   |   |   |   |   |    |    |    |    |    |
|--------------------------------------------------------------|-----|----------------|---|---|---|---|---|---|---|---|---|----|----|----|----|----|
|                                                              |     | 0              | 1 | 2 | 3 | 4 | 5 | 6 | 7 | 8 | 9 | 10 | 11 | 12 | 13 | 14 |
| BVDV-1<br>immunization group                                 | 116 | -              | + | - | - | - | - | - | - | + | + | -  | +  | -  | -  | -  |
|                                                              | 117 | -              | - | - | - | - | - | - | - | - | + | +  | +  | -  | -  | -  |
|                                                              | 118 | -              | + | - | - | - | - | - | - | - | + | -  | -  | +  | -  | -  |
| BoHV-1<br>gE/E2-Linker-E2 <sup>+</sup><br>immunization group | 119 | -              | + | - | - | - | + | + | + | + | + | -  | -  | -  | -  | -  |
|                                                              | 120 | -              | - | - | - | + | + | + | + | + | + | -  | -  | -  | -  | -  |
|                                                              | 121 | -              | + | - | - | - | + | + | + | + | + | -  | -  | -  | -  | -  |
| Challenge control<br>group                                   | 122 | -              | - | - | - | + | + | + | + | + | + | -  | -  | -  | -  | -  |
|                                                              | 123 | -              | - | - | - | + | + | + | + | + | + | -  | +  | -  | +  | +  |
|                                                              | 124 | -              | + | - | + | - | + | + | + | + | - | +  | +  | -  | -  | -  |

Supplemental Table S8. White blood cell count in calves after challenge

| Group<br>and calves number                                   |     | Challenge days |      |      |      |      |      |      |      |      |      |      |      |      |      |      |      |      |
|--------------------------------------------------------------|-----|----------------|------|------|------|------|------|------|------|------|------|------|------|------|------|------|------|------|
|                                                              |     | 0              | 1    | 2    | 3    | 4    | 5    | 6    | 7    | 8    | 9    | 10   | 11   | 12   | 13   | 14   | 15   | 16   |
| BVDV-1<br>immunization group                                 | 116 | 10.1           | 10.1 | 10.5 | 11.5 | 10.2 | 8.2  | 4.7  | 4.9  | 5.1  | 12.0 | 8.3  | 7.4  | 7.2  | 7.5  | 8.5  | 8.1  | 9.6  |
|                                                              | 117 | 6.2            | 8.3  | 8.5  | 13.6 | 10.3 | 7.7  | 6.0  | 4.5  | 4.4  | 5.4  | 6.5  | 5.3  | 4.9  | 5.6  | 5.1  | 6.4  | 6.2  |
|                                                              | 118 | 9.9            | 9.1  | 10.0 | 12.1 | 9.7  | 8.0  | 6.1  | 6.9  | 6.1  | 7.2  | 7.0  | 7.8  | 9.0  | 9.7  | 8.7  | 9.0  | 9.2  |
| BoHV-1<br>gE/E2-Linker-E2 <sup>+</sup><br>immunization group | 119 | 7.4            | 6.1  | 7.3  | 5.6  | 6.3  | 6.8  | 6.8  | 6.8  | 7.0  | 7.4  | 6.5  | 7.1  | 7.9  | 8.8  | 8.8  | 8.3  | 9.2  |
|                                                              | 120 | 10.2           | 9.8  | 10.2 | 10.0 | 10.5 | 10.2 | 10.1 | 10.1 | 10.5 | 11.8 | 10.6 | 8.5  | 10.2 | 11.0 | 9.6  | 9.7  | 9.6  |
|                                                              | 121 | 8.0            | 7.7  | 7.3  | 7.0  | 7.1  | 6.7  | 6.3  | 6.2  | 6.7  | 7.1  | 7.5  | 6.3  | 6.9  | 7.9  | 8.0  | 6.3  | 6.9  |
| Challenge<br>control group                                   | 122 | 10.5           | 10.6 | 10.2 | 11.5 | 9.7  | 12.1 | 10.5 | 9.2  | 9.2  | 7.3  | 7.0  | 9.7  | 10.5 | 8.6  | 10.6 | 9.8  | 9.7  |
|                                                              | 123 | 12.3           | 10.2 | 11.5 | 10.5 | 9.8  | 11.4 | 9.8  | 10.8 | 9.2  | 8.9  | 9.0  | 9.8  | 11.5 | 10.4 | 9.5  | 11.2 | 9.6  |
|                                                              | 124 | 9.8            | 11.5 | 10.2 | 12.1 | 11.3 | 10.6 | 10.0 | 9.2  | 9.3  | 7.9  | 8.0  | 11.3 | 9.2  | 12.6 | 8.7  | 10.6 | 10.0 |
| Blank control<br>group                                       | 101 | 10.2           | 8.3  | 8.6  | 9.5  | 8.5  | 8.6  | 10.6 | 8.7  | 9.2  | 9.1  | 8.8  | 9.3  | 9.9  | 10.6 | 12.6 | 12.5 | 10.2 |
|                                                              | 102 | 8.9            | 8.4  | 8.6  | 8.4  | 9.0  | 9.2  | 8.6  | 8.9  | 9.2  | 9.1  | 8.8  | 9.3  | 9.1  | 12.3 | 14.5 | 10.3 | 11.3 |
|                                                              | 103 | 9.2            | 9.8  | 10.5 | 10.5 | 12.3 | 11.5 | 10.2 | 9.8  | 9.3  | 11.5 | 12.6 | 13.4 | 10.5 | 9.8  | 9.8  | 8.9  | 10.5 |



Supplemental Table S9. Lung Histology score in guinea pigs  
after challenge BoHV-1

| Pathological changes                  |    | Bronchi           |                        |                        |
|---------------------------------------|----|-------------------|------------------------|------------------------|
| Group                                 |    | Percentage of     | Degree of infiltration | Interstitial pneumonia |
| and guinea pig number                 |    | infiltrated sites |                        |                        |
| Challenge control group               | 25 | 2                 | 2                      | 3                      |
|                                       | 26 | 3                 | 3                      | 3                      |
|                                       | 27 | 2                 | 1                      | 2                      |
|                                       | 28 | 2                 | 2                      | 2                      |
|                                       | 29 | 2                 | 2                      | 2                      |
|                                       | 30 | 1                 | 1                      | 1                      |
|                                       | 31 | 1                 | 0                      | 1                      |
|                                       | 32 | 1                 | 0                      | 0                      |
| BoHV-1 immunization group             | 33 | 0                 | 0                      | 0                      |
|                                       | 34 | 1                 | 1                      | 0                      |
|                                       | 35 | 0                 | 0                      | 0                      |
|                                       | 36 | 0                 | 0                      | 0                      |
|                                       | 37 | 0                 | 0                      | 1                      |
|                                       | 38 | 0                 | 0                      | 1                      |
|                                       | 39 | 0                 | 0                      | 0                      |
|                                       | 40 | 0                 | 0                      | 0                      |
| BoHV-1 $\Delta$ gE immunization group | 41 | 1                 | 2                      | 1                      |
|                                       | 42 | 0                 | 1                      | 1                      |
|                                       | 43 | 0                 | 0                      | 0                      |
|                                       | 44 | 0                 | 0                      | 0                      |
|                                       | 45 | 0                 | 0                      | 0                      |
|                                       | 46 | 1                 | 0                      | 1                      |
|                                       | 47 | 1                 | 0                      | 1                      |
|                                       | 48 | 1                 | 0                      | 0                      |
| Blank control group                   | 19 | 1                 | 0                      | 0                      |
|                                       | 20 | 0                 | 0                      | 0                      |

|    |   |   |   |
|----|---|---|---|
| 21 | 1 | 0 | 0 |
|----|---|---|---|

Supplemental Table S10. Lung Histology score in calves after  
challenge BoHV-1

| Group<br>and calf number                                     | Pathological changes | Bronchi                            |                           | Interstitial<br>pneumonia |
|--------------------------------------------------------------|----------------------|------------------------------------|---------------------------|---------------------------|
|                                                              |                      | Percentage of<br>infiltrated sites | Degree of<br>infiltration |                           |
| Challenge control<br>group                                   | 104                  | 3                                  | 2                         | 2                         |
|                                                              | 105                  | 2                                  | 2                         | 2                         |
|                                                              | 106                  | 1                                  | 2                         | 1                         |
| BoHV-1 immunization<br>group                                 | 107                  | 0                                  | 0                         | 0                         |
|                                                              | 108                  | 1                                  | 1                         | 0                         |
|                                                              | 109                  | 0                                  | 0                         | 0                         |
| BoHV-1 $\Delta$ gE<br>immunization group                     | 110                  | 0                                  | 1                         | 0                         |
|                                                              | 111                  | 0                                  | 0                         | 0                         |
|                                                              | 112                  | 0                                  | 0                         | 0                         |
| BoHV-1<br>gE/E2-Linker-E2 <sup>+</sup><br>immunization group | 113                  | 0                                  | 0                         | 0                         |
|                                                              | 114                  | 0                                  | 0                         | 0                         |
|                                                              | 115                  | 0                                  | 0                         | 0                         |

Supplemental Table S11. Small intestine Histology score in calves after challenge BVDV-1

| Group<br>and calf number     | Pathological changes |   |
|------------------------------|----------------------|---|
|                              | Small intestine      |   |
| Challenge control<br>group   | 122                  | 2 |
|                              | 123                  | 3 |
|                              | 124                  | 3 |
| BVDV-1 immunization<br>group | 116                  | 0 |
|                              | 117                  | 0 |
|                              | 118                  | 1 |
| BoHV-1                       | 119                  | 0 |
| gE/E2-Linker-E2 <sup>+</sup> | 120                  | 1 |
| immunization group           | 121                  | 1 |
